# Supplementary material
Source: MDPI journal article supplement (https://www.mdpi.com/2073-4352/13/10/1426)
Supplement: s1 [file s1]

Supporting information

**Two-dimensional MOF-TM catalysts for electrocatalytic N<sub>2</sub> and CO<sub>2</sub> reduction: a DFT investigation**

Anqi She<sup>1</sup>, Ming Wang<sup>1</sup>, Shuang Li<sup>1</sup>, Yanhua Dong<sup>1\*</sup>, and Dandan Wang<sup>2\*</sup>

<sup>1</sup> Department of Mathematics and Computer Science, Jilin Normal University, Siping 136000, China

<sup>2</sup> Key Laboratory of Functional Materials Physics and Chemistry of Ministry of Education, College of Physics, Jilin Normal University, Changchun 130103, China

● Correspondence: computerdyp@jlnu.edu.cn (Y. H. Dong); mila880227@126.com (D. D. Wang)

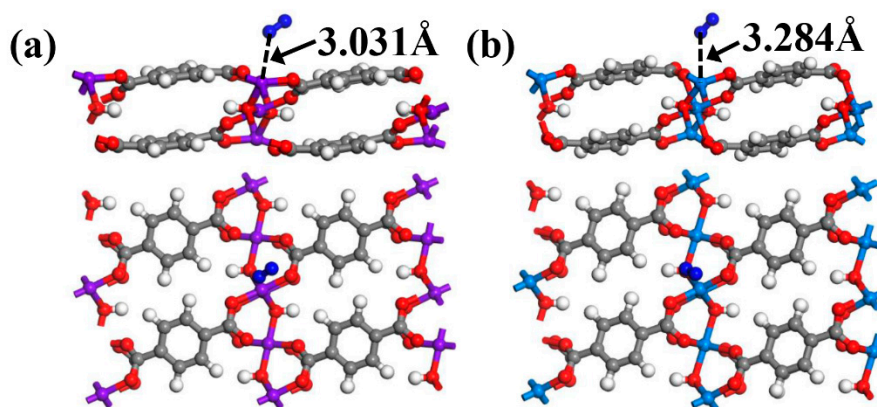

**Figure S1.** Side and top views of adsorption configurations for N<sub>2</sub> on (a) MOF-Cu, (b) MOF-Zn. Color cards: C: Grey, H: White, O: Red, Cu: Purple, Zn: Sky blue.

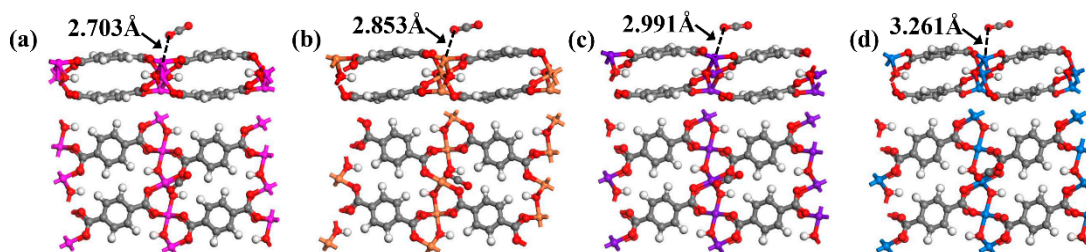

**Figure S2.** Side and top views of adsorption configurations for CO<sub>2</sub> on (a) MOF-Co, (b) MOF-Ni, (c) MOF-Cu, (d) MOF-Zn. Color cards: C: Grey, H: White, O: Red, Co: Pink, Ni: Orange, Cu: Purple, Zn: Sky blue.

2D MOF-Fe is a promising bifunctional electrocatalyst for CO<sub>2</sub>RR to CH<sub>3</sub>OH and NRR to NH<sub>3</sub>.

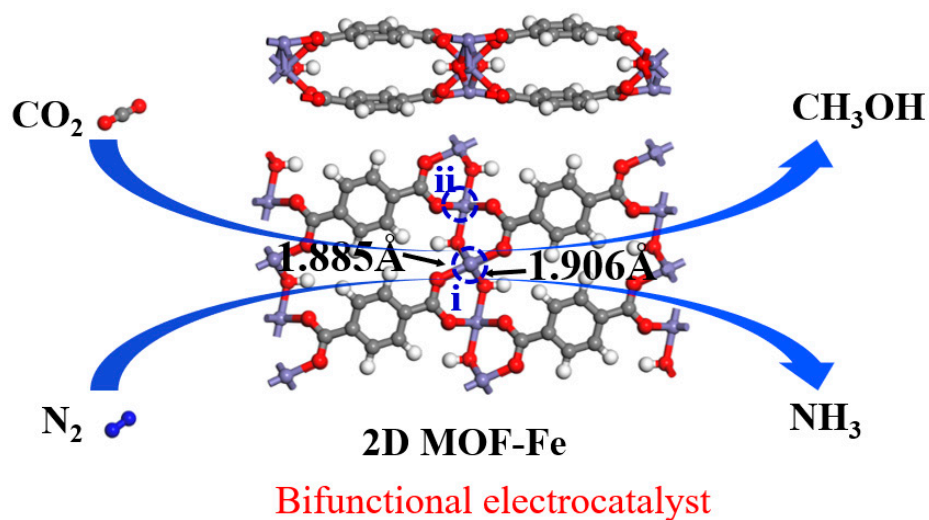

The coordinate files of different MOF-TMs (TM = Fe, Co, Ni):

MOF-Fe

1.0

|              |               |               |
|--------------|---------------|---------------|
| 6.3337001801 | 0.0000000000  | 0.0000000000  |
| 1.2816613249 | 10.1269185323 | 0.0000000000  |
| 1.8305125602 | -1.9231900066 | 22.3666639851 |

| Fe | O  | C  | H  |
|----|----|----|----|
| 3  | 10 | 16 | 10 |

Direct

|             |             |             |
|-------------|-------------|-------------|
| 0.970230035 | 0.023870005 | 0.569270042 |
| 0.029769978 | 0.976129988 | 0.430729999 |
| 0.500000028 | 0.000000004 | 0.500000020 |
| 0.873099930 | 0.155400000 | 0.413000011 |
| 0.126899992 | 0.844600069 | 0.587000029 |
| 0.541470004 | 0.107630004 | 0.428529995 |
| 0.458529995 | 0.892370060 | 0.571470045 |
| 0.169429957 | 0.788869995 | 0.438669999 |
| 0.830569905 | 0.211130004 | 0.561330041 |
| 0.514699937 | 0.834399998 | 0.443300039 |
| 0.485299998 | 0.165600013 | 0.556700001 |
| 0.818769919 | 0.949430050 | 0.499030001 |
| 0.181230006 | 0.050570008 | 0.500970039 |
| 0.667469977 | 0.191530019 | 0.413330031 |
| 0.332530021 | 0.808470051 | 0.586670009 |
| 0.573399981 | 0.341500051 | 0.420000053 |
| 0.426599951 | 0.658499971 | 0.579999988 |
| 0.355129982 | 0.393370028 | 0.421670021 |

|             |             |             |
|-------------|-------------|-------------|
| 0.644869950 | 0.606629995 | 0.578330020 |
| 0.291399970 | 0.530500007 | 0.425000021 |
| 0.708599957 | 0.469500039 | 0.575000019 |
| 0.457629991 | 0.609270022 | 0.424670002 |
| 0.542369941 | 0.390730001 | 0.575330039 |
| 0.675330021 | 0.564470053 | 0.411670041 |
| 0.324669977 | 0.435530016 | 0.588330000 |
| 0.728670001 | 0.426930001 | 0.410330007 |
| 0.271330006 | 0.573070022 | 0.589670033 |
| 0.372869981 | 0.757629990 | 0.432330040 |
| 0.627129955 | 0.242370009 | 0.567670000 |
| 0.835129958 | 0.852830030 | 0.501559981 |
| 0.164869980 | 0.147170019 | 0.498440016 |
| 0.763989948 | 0.675490019 | 0.575970038 |
| 0.236009979 | 0.324510027 | 0.424030002 |
| 0.874670059 | 0.425480040 | 0.567640026 |
| 0.125330023 | 0.574519982 | 0.432360014 |
| 0.207649972 | 0.366809996 | 0.593030009 |
| 0.792350031 | 0.633190050 | 0.406970032 |
| 0.105109952 | 0.618380042 | 0.597710020 |
| 0.894889971 | 0.381620027 | 0.402290020 |

MOF-Co

1.0

|              |               |               |
|--------------|---------------|---------------|
| 6.3337001801 | 0.0000000000  | 0.0000000000  |
| 1.2816613249 | 10.1269185323 | 0.0000000000  |
| 1.8305125602 | -1.9231900066 | 22.3666639851 |

Co O C H  
3 10 16 10

Direct

|             |             |             |
|-------------|-------------|-------------|
| 0.970230035 | 0.023870005 | 0.569270042 |
| 0.029769978 | 0.976129988 | 0.430729999 |
| 0.500000028 | 0.000000004 | 0.500000020 |
| 0.873099930 | 0.155400000 | 0.413000011 |
| 0.126899992 | 0.844600069 | 0.587000029 |
| 0.541470004 | 0.107630004 | 0.428529995 |
| 0.458529995 | 0.892370060 | 0.571470045 |
| 0.169429957 | 0.788869995 | 0.438669999 |
| 0.830569905 | 0.211130004 | 0.561330041 |
| 0.514699937 | 0.834399998 | 0.443300039 |
| 0.485299998 | 0.165600013 | 0.556700001 |
| 0.818769919 | 0.949430050 | 0.499030001 |

|             |             |             |
|-------------|-------------|-------------|
| 0.181230006 | 0.050570008 | 0.500970039 |
| 0.667469977 | 0.191530019 | 0.413330031 |
| 0.332530021 | 0.808470051 | 0.586670009 |
| 0.573399981 | 0.341500051 | 0.420000053 |
| 0.426599951 | 0.658499971 | 0.579999988 |
| 0.355129982 | 0.393370028 | 0.421670021 |
| 0.644869950 | 0.606629995 | 0.578330020 |
| 0.291399970 | 0.530500007 | 0.425000021 |
| 0.708599957 | 0.469500039 | 0.575000019 |
| 0.457629991 | 0.609270022 | 0.424670002 |
| 0.542369941 | 0.390730001 | 0.575330039 |
| 0.675330021 | 0.564470053 | 0.411670041 |
| 0.324669977 | 0.435530016 | 0.588330000 |
| 0.728670001 | 0.426930001 | 0.410330007 |
| 0.271330006 | 0.573070022 | 0.589670033 |
| 0.372869981 | 0.757629990 | 0.432330040 |
| 0.627129955 | 0.242370009 | 0.567670000 |
| 0.835129958 | 0.852830030 | 0.501559981 |
| 0.164869980 | 0.147170019 | 0.498440016 |
| 0.763989948 | 0.675490019 | 0.575970038 |
| 0.236009979 | 0.324510027 | 0.424030002 |
| 0.874670059 | 0.425480040 | 0.567640026 |
| 0.125330023 | 0.574519982 | 0.432360014 |
| 0.207649972 | 0.366809996 | 0.593030009 |
| 0.792350031 | 0.633190050 | 0.406970032 |
| 0.105109952 | 0.618380042 | 0.597710020 |
| 0.894889971 | 0.381620027 | 0.402290020 |

MOF-Ni

1.0

|              |               |               |
|--------------|---------------|---------------|
| 6.3337001801 | 0.0000000000  | 0.0000000000  |
| 1.2816613249 | 10.1269185323 | 0.0000000000  |
| 1.8305125602 | -1.9231900066 | 22.3666639851 |

|    |    |    |    |
|----|----|----|----|
| Ni | O  | C  | H  |
| 3  | 10 | 16 | 10 |

Direct

|             |             |             |
|-------------|-------------|-------------|
| 0.970230035 | 0.023870005 | 0.569270042 |
| 0.029769978 | 0.976129988 | 0.430729999 |
| 0.500000028 | 0.000000004 | 0.500000020 |
| 0.873099930 | 0.155400000 | 0.413000011 |
| 0.126899992 | 0.844600069 | 0.587000029 |
| 0.541470004 | 0.107630004 | 0.428529995 |

|             |             |             |
|-------------|-------------|-------------|
| 0.458529995 | 0.892370060 | 0.571470045 |
| 0.169429957 | 0.788869995 | 0.438669999 |
| 0.830569905 | 0.211130004 | 0.561330041 |
| 0.514699937 | 0.834399998 | 0.443300039 |
| 0.485299998 | 0.165600013 | 0.556700001 |
| 0.818769919 | 0.949430050 | 0.499030001 |
| 0.181230006 | 0.050570008 | 0.500970039 |
| 0.667469977 | 0.191530019 | 0.413330031 |
| 0.332530021 | 0.808470051 | 0.586670009 |
| 0.573399981 | 0.341500051 | 0.420000053 |
| 0.426599951 | 0.658499971 | 0.579999988 |
| 0.355129982 | 0.393370028 | 0.421670021 |
| 0.644869950 | 0.606629995 | 0.578330020 |
| 0.291399970 | 0.530500007 | 0.425000021 |
| 0.708599957 | 0.469500039 | 0.575000019 |
| 0.457629991 | 0.609270022 | 0.424670002 |
| 0.542369941 | 0.390730001 | 0.575330039 |
| 0.675330021 | 0.564470053 | 0.411670041 |
| 0.324669977 | 0.435530016 | 0.588330000 |
| 0.728670001 | 0.426930001 | 0.410330007 |
| 0.271330006 | 0.573070022 | 0.589670033 |
| 0.372869981 | 0.757629990 | 0.432330040 |
| 0.627129955 | 0.242370009 | 0.567670000 |
| 0.835129958 | 0.852830030 | 0.501559981 |
| 0.164869980 | 0.147170019 | 0.498440016 |
| 0.763989948 | 0.675490019 | 0.575970038 |
| 0.236009979 | 0.324510027 | 0.424030002 |
| 0.874670059 | 0.425480040 | 0.567640026 |
| 0.125330023 | 0.574519982 | 0.432360014 |
| 0.207649972 | 0.366809996 | 0.593030009 |
| 0.792350031 | 0.633190050 | 0.406970032 |
| 0.105109952 | 0.618380042 | 0.597710020 |
| 0.894889971 | 0.381620027 | 0.402290020 |
